# Supplementary material for: Estrogen receptor alpha (ERα)–mediated coregulator binding and gene expression discriminates the toxic ERα agonist diethylstilbestrol (DES) from the endogenous ERα agonist 17β-estradiol (E2)
Source: PubMed Central journal article supplement (PMC7505815; doi:10.1007/s10565-020-09516-6), 2020-02-22
Supplement: 10565_2020_9516_MOESM1_ESM.pdf [file 10565_2020_9516_MOESM1_ESM.pdf]

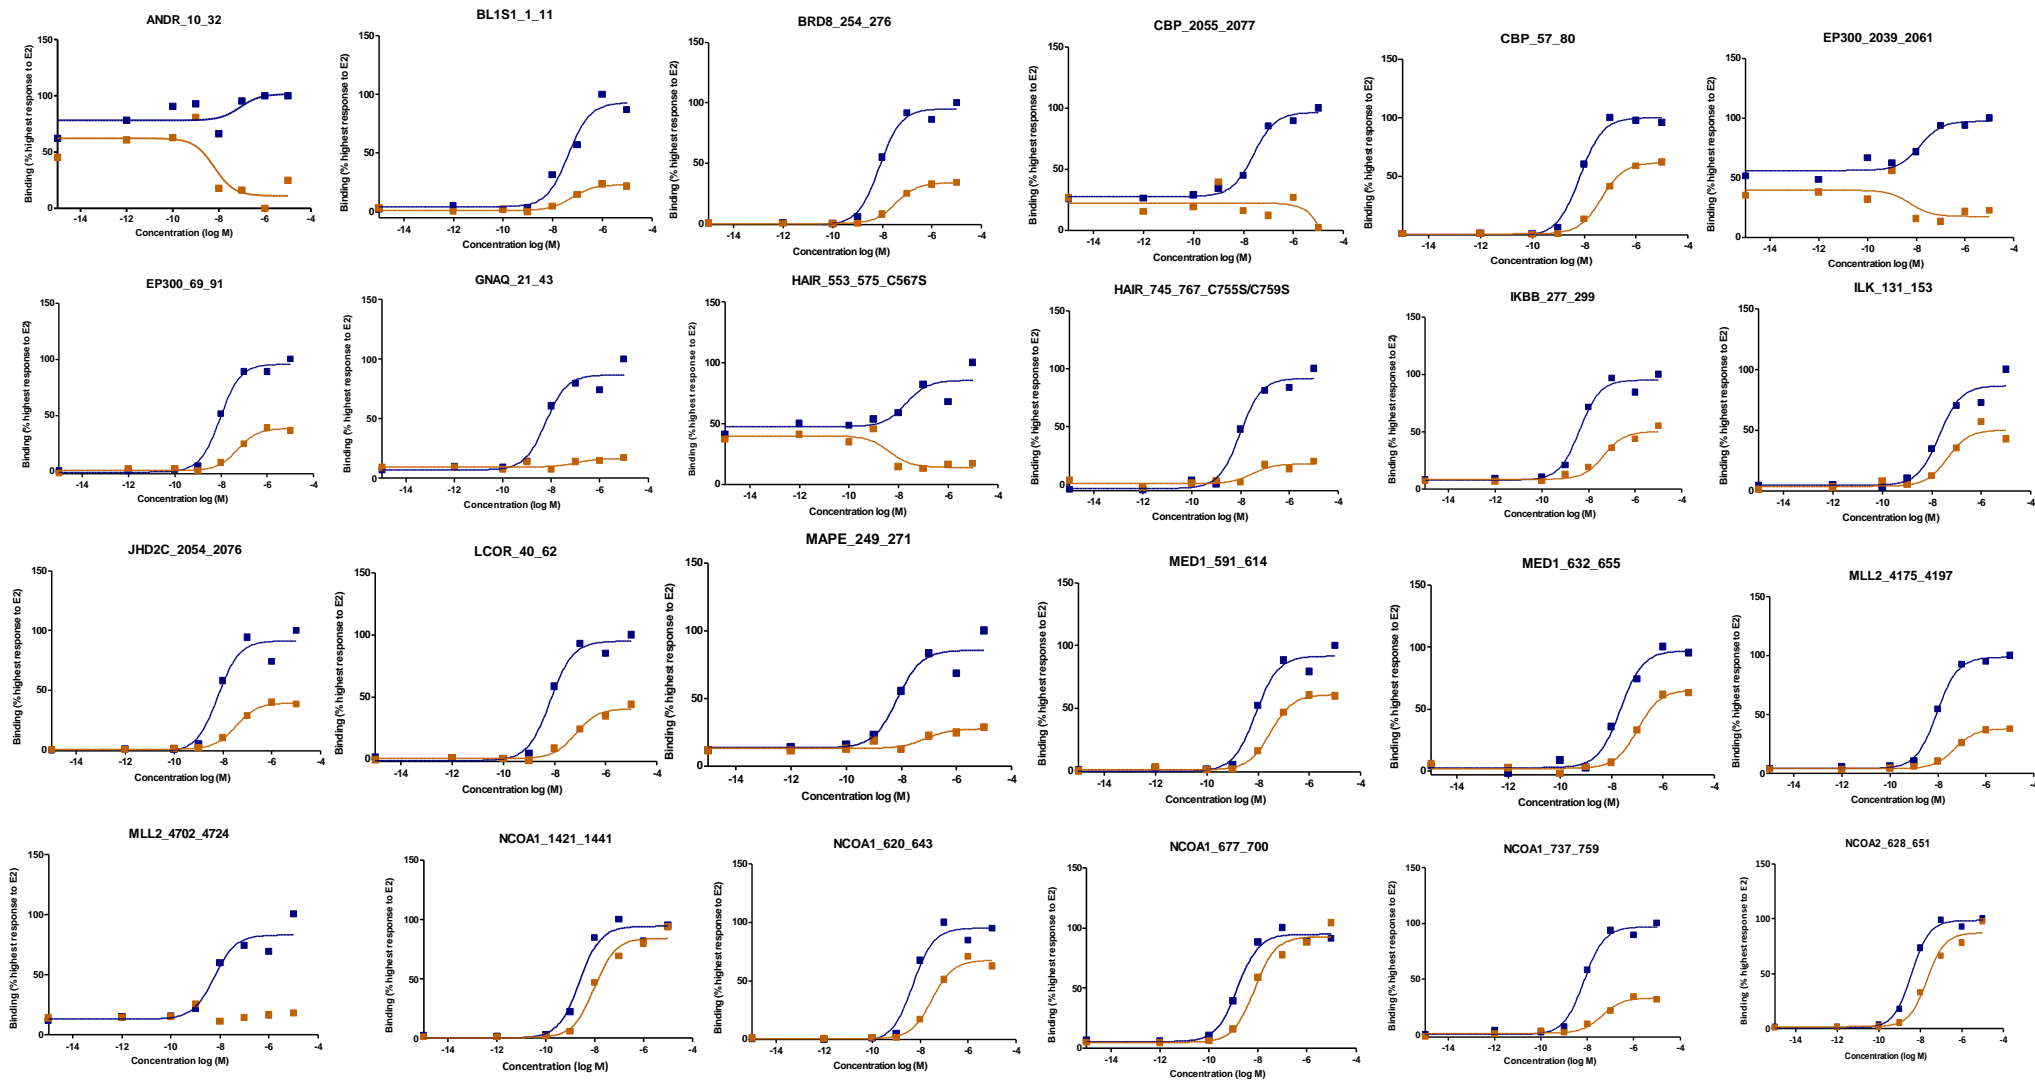

E2 (blue) and DES (orange) concentration dependent induction of ER $\alpha$ -LBD binding to coregulator motifs with coefficient of determination ( $R^2$ )  $\geq$  0.8 for at least either E2 or DES. The binding expressed as a percentage of maximum response of E2.

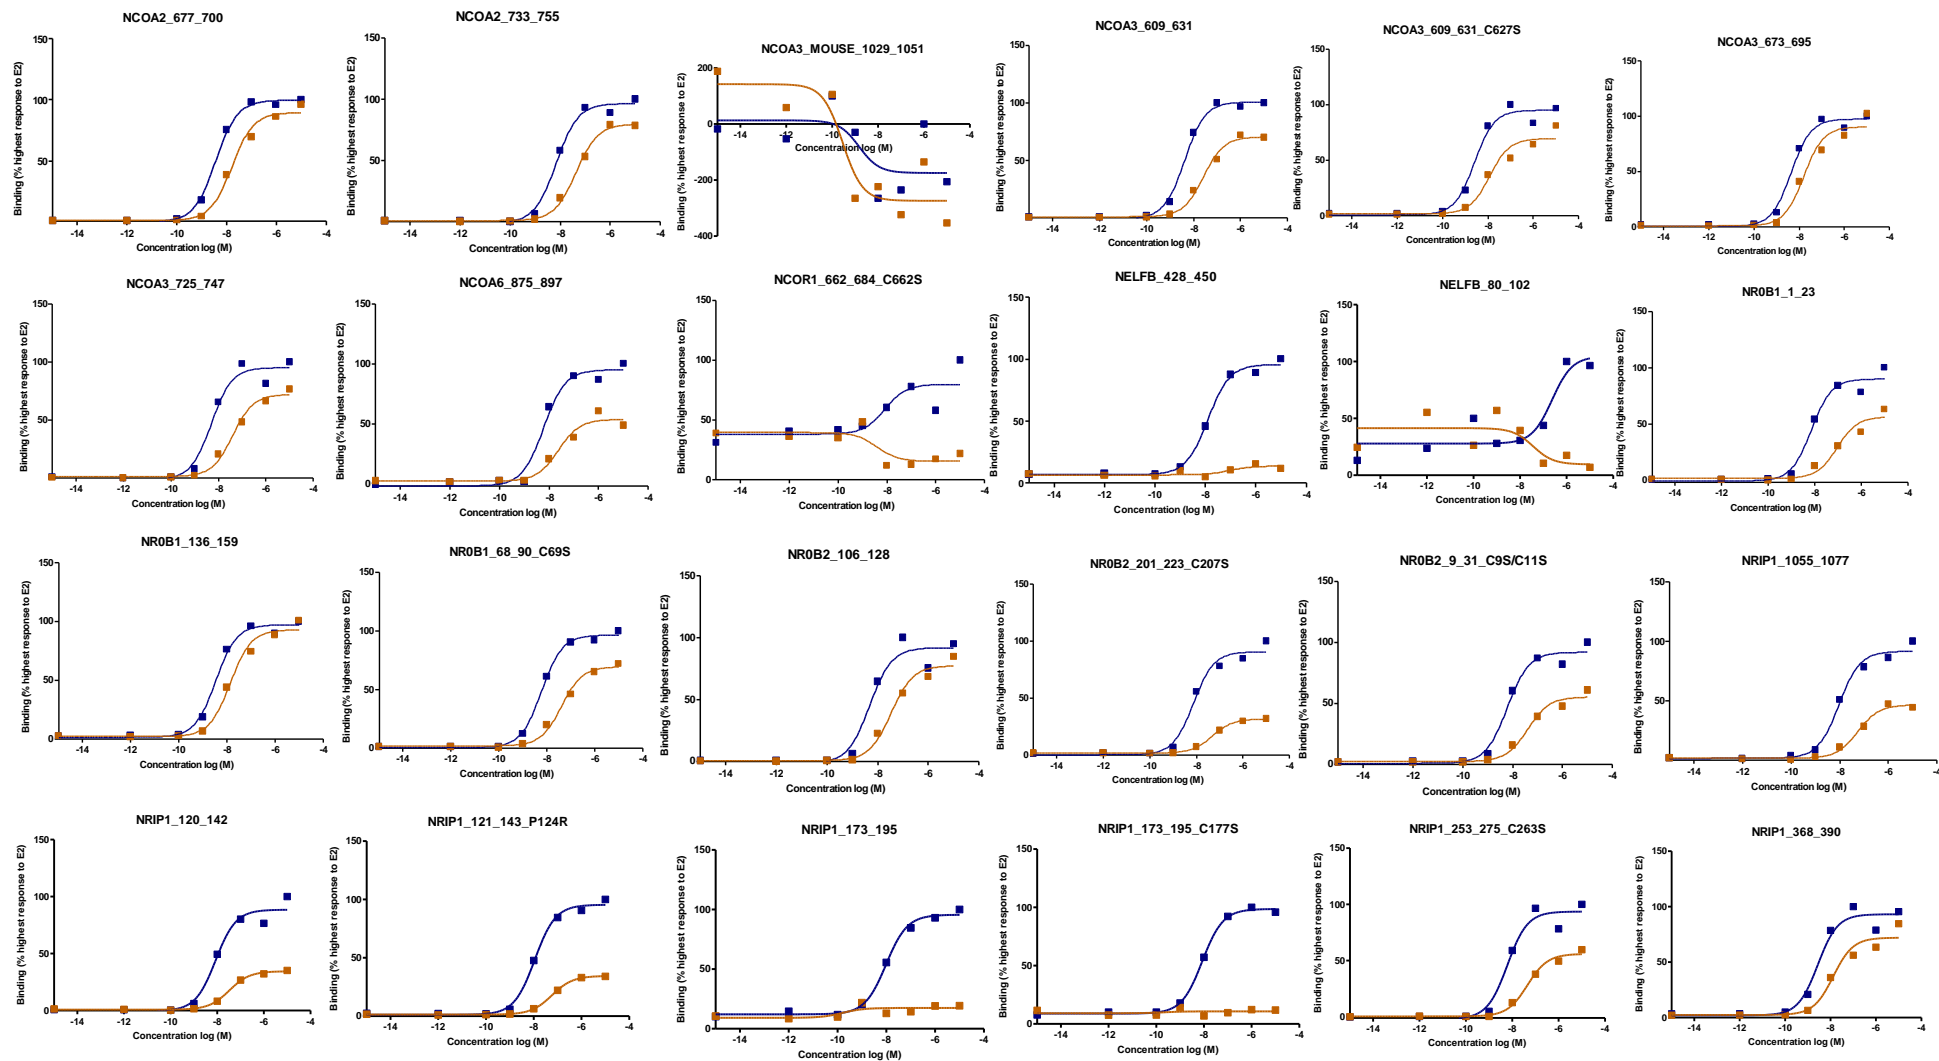

E2 (blue) and DES (orange) concentration dependent induction of ER $\alpha$ -LBD binding to coregulator motifs with coefficient of determination ( $R^2$ )  $\geq$  of 0.8 for at least either E2 or DES. The binding expressed as a percentage of maximum response of E2.

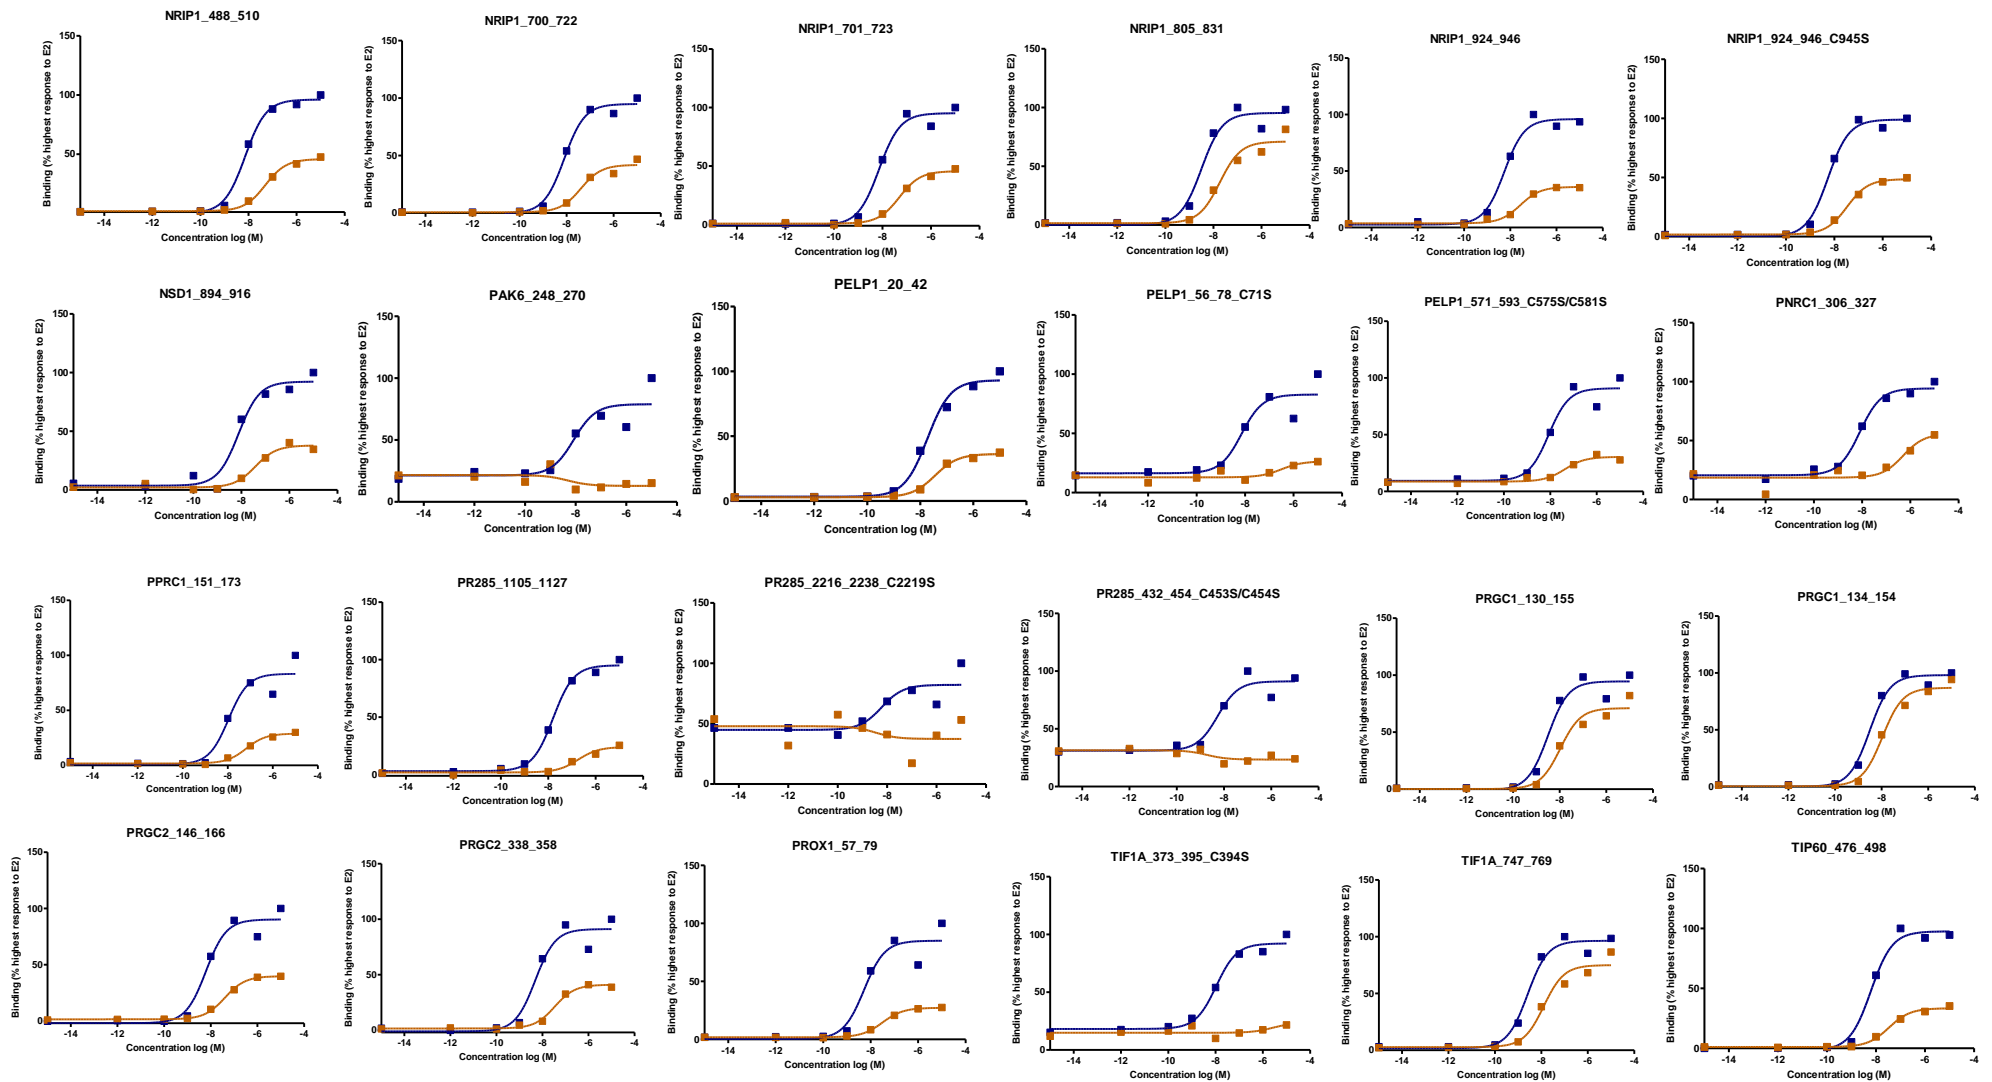

E2 (blue) and DES (orange) concentration dependent induction of ER $\alpha$ -LBD binding to coregulator motifs with coefficient of determination ( $R^2$ )  $\geq$  of 0.8 for at least either E2 or DES. The binding expressed as a percentage of maximum response of E2.

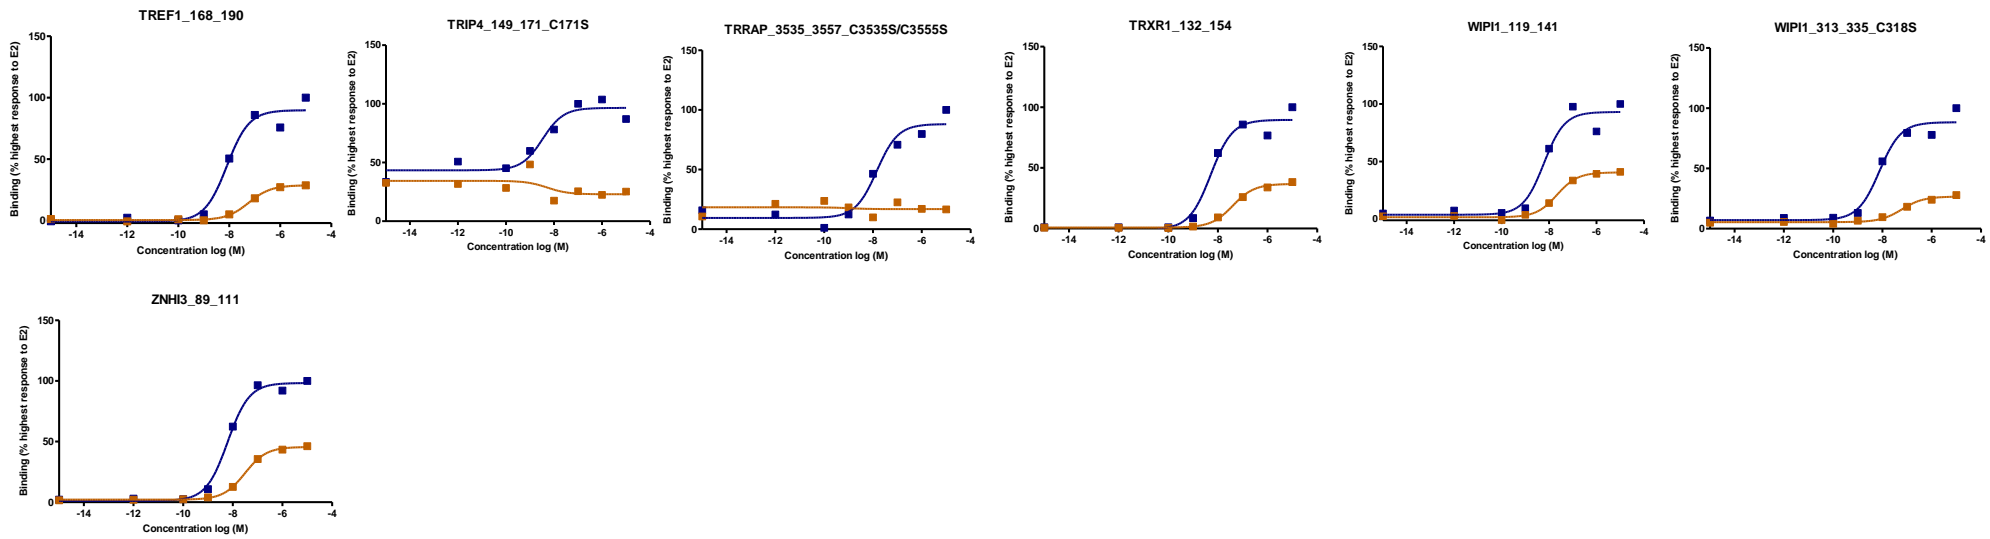

E2 (blue) and DES (orange) concentration dependent induction of ER $\alpha$ -LBD binding to coregulator motifs with coefficient of determination ( $R^2$ )  $\geq$  of 0.8 for at least either E2 or DES. The binding expressed as a percentage of maximum response of E2.
