# Supplementary material for: Estrogen receptor alpha (ERα)–mediated coregulator binding and gene expression discriminates the toxic ERα agonist diethylstilbestrol (DES) from the endogenous ERα agonist 17β-estradiol (E2)
Source: PubMed Central journal article supplement (PMC7505815; doi:10.1007/s10565-020-09516-6), 2020-02-22

# Overrepresented GO-BP categories

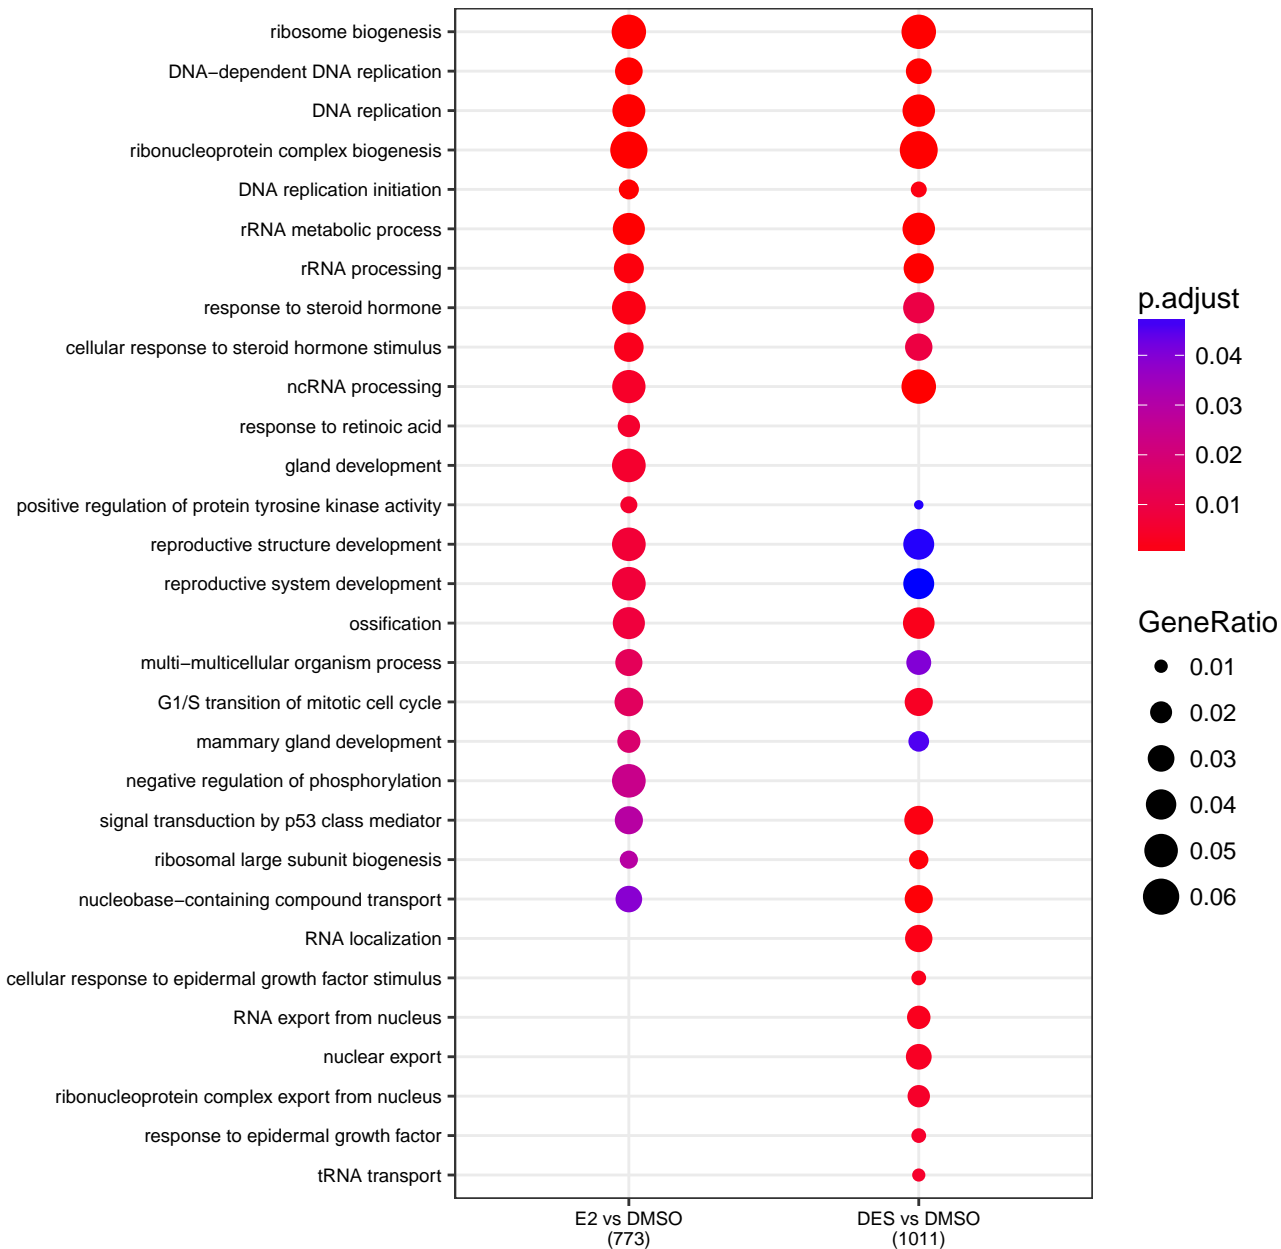

Supplement: 10565_2020_9516_MOESM2_ESM.pdf [file 10565_2020_9516_MOESM2_ESM.pdf]
