# Supplementary material for: Estrogen receptor alpha (ERα)–mediated coregulator binding and gene expression discriminates the toxic ERα agonist diethylstilbestrol (DES) from the endogenous ERα agonist 17β-estradiol (E2)
Source: PubMed Central journal article supplement (PMC7505815; doi:10.1007/s10565-020-09516-6), 2020-02-22
Supplement: 10565_2020_9516_MOESM3_ESM.pdf [file 10565_2020_9516_MOESM3_ESM.pdf]

### Pathway analysis for the genes that expressed by E2 and DES

| Pathway name                                                                      | set size | candidates contained | p-value  | pathway source |
|-----------------------------------------------------------------------------------|----------|----------------------|----------|----------------|
| Transcriptional regulation by the AP-2 (TFAP2) family of transcription factors    | 42       | 10 (23.8%)           | 7.58E-07 | Reactome       |
| Adipogenesis                                                                      | 131      | 16 (12.2%)           | 6.05E-06 | Wikipath ways  |
| Validated nuclear estrogen receptor alpha network                                 | 65       | 11 (16.9%)           | 7.67E-06 | PID            |
| rRNA processing                                                                   | 67       | 11 (16.7%)           | 8.94E-06 | Reactome       |
| rRNA modification in the nucleus and cytosol                                      | 61       | 10 (16.7%)           | 2.29E-05 | Reactome       |
| rRNA processing in the nucleus and cytosol                                        | 61       | 10 (16.7%)           | 2.29E-05 | Reactome       |
| Notch-mediated HES/HEY network                                                    | 51       | 9 (17.6%)            | 3.67E-05 | PID            |
| HIF-1-alpha transcription factor network                                          | 67       | 10 (14.9%)           | 6.14E-05 | PID            |
| RAF-independent MAPK1/3 activation                                                | 23       | 6 (26.1%)            | 7.63E-05 | Reactome       |
| TGF-beta Signaling Pathway                                                        | 132      | 14 (10.6%)           | 0.000111 | Wikipath ways  |
| Aryl Hydrocarbon Receptor                                                         | 46       | 8 (17.4%)            | 0.000111 | Wikipath ways  |
| ID signaling pathway                                                              | 16       | 5 (31.2%)            | 0.000121 | Wikipath ways  |
| TFAP2 (AP-2) family regulates transcription of growth factors and their receptors | 16       | 5 (31.2%)            | 0.000121 | Reactome       |
| TFAP2 (AP-2) family regulates transcription of other transcription factors        | 4        | 3 (75.0%)            | 0.000138 | Reactome       |
| HIF-2-alpha transcription factor network                                          | 36       | 7 (19.4%)            | 0.000144 | PID            |
| Notch Signaling Pathway                                                           | 61       | 9 (14.8%)            | 0.000157 | Wikipath ways  |
| ID                                                                                | 26       | 6 (23.1%)            | 0.00016  | NetPath        |
| Ectoderm Differentiation                                                          | 142      | 14 (9.9%)            | 0.000241 | Wikipath ways  |
| Transcriptional activity of SMAD2-SMAD3-SMAD4 heterotrimer                        | 5        | 3 (60.0%)            | 0.000336 | Wikipath ways  |
| TFAP2 (AP-2) family regulates transcription of cell cycle factors                 | 5        | 3 (60.0%)            | 0.000336 | Reactome       |
| G1 to S cell cycle control                                                        | 68       | 9 (13.2%)            | 0.000363 | Wikipath ways  |
| TGF-beta signaling pathway - Homo sapiens (human)                                 | 84       | 10 (11.9%)           | 0.000416 | KEGG           |
| Bladder Cancer                                                                    | 31       | 6 (19.4%)            | 0.000446 | Wikipath ways  |
| IL17 signaling pathway                                                            | 31       | 6 (19.4%)            | 0.000446 | Wikipath ways  |
| Activation of the TFAP2 (AP-2) family of transcription factors                    | 13       | 4 (30.8%)            | 0.00065  | Reactome       |
| Signaling by NOTCH1                                                               | 6        | 3 (50.0%)            | 0.000655 | Wikipath ways  |

|                                                                                              |     |            |              |                  |
|----------------------------------------------------------------------------------------------|-----|------------|--------------|------------------|
| Nuclear Receptors Meta-Pathway                                                               | 316 | 22 (7.0%)  | 0.000<br>767 | Wikipath<br>ways |
| Mitotic G1-G1/S phases                                                                       | 92  | 10 (10.9%) | 0.000<br>86  | Reactome         |
| TGF-B Signaling in Thyroid Cells for Epithelial-Mesenchymal Transition                       | 14  | 4 (28.6%)  | 0.000<br>886 | Wikipath<br>ways |
| IL6-mediated signaling events                                                                | 48  | 7 (14.6%)  | 0.000<br>905 | PID              |
| tumor suppressor arf inhibits ribosomal biogenesis                                           | 24  | 5 (20.8%)  | 0.000<br>95  | BioCarta         |
| Breast cancer - Homo sapiens (human)                                                         | 146 | 13 (8.9%)  | 0.001<br>05  | KEGG             |
| Vitamin D Receptor Pathway                                                                   | 184 | 15 (8.2%)  | 0.001<br>05  | Wikipath<br>ways |
| TFAP2A acts as a transcriptional repressor during retinoic acid induced cell differentiation | 7   | 3 (42.9%)  | 0.001<br>12  | Reactome         |
| Hepatitis C and Hepatocellular Carcinoma                                                     | 50  | 7 (14.0%)  | 0.001<br>16  | Wikipath<br>ways |
| Pancreatic cancer - Homo sapiens (human)                                                     | 66  | 8 (12.1%)  | 0.001<br>38  | KEGG             |
| Oncostatin_M                                                                                 | 39  | 6 (15.4%)  | 0.001<br>58  | NetPath          |
| Hippo signaling pathway - Homo sapiens (human)                                               | 154 | 13 (8.5%)  | 0.001<br>61  | KEGG             |
| Spinal Cord Injury                                                                           | 117 | 11 (9.4%)  | 0.001<br>62  | Wikipath<br>ways |
| Ribosome biogenesis in eukaryotes - Homo sapiens (human)                                     | 106 | 10 (10.0%) | 0.001<br>64  | KEGG             |
| Neural Crest Differentiation                                                                 | 101 | 10 (9.9%)  | 0.001<br>77  | Wikipath<br>ways |
| Constitutive Signaling by NOTCH1 HD+PEST Domain Mutants                                      | 54  | 7 (13.0%)  | 0.001<br>84  | Reactome         |
| Signaling by NOTCH1 HD+PEST Domain Mutants in Cancer                                         | 54  | 7 (13.0%)  | 0.001<br>84  | Reactome         |
| Signaling by NOTCH1 in Cancer                                                                | 54  | 7 (13.0%)  | 0.001<br>84  | Reactome         |
| Constitutive Signaling by NOTCH1 PEST Domain Mutants                                         | 54  | 7 (13.0%)  | 0.001<br>84  | Reactome         |
| Signaling by NOTCH1 PEST Domain Mutants in Cancer                                            | 54  | 7 (13.0%)  | 0.001<br>84  | Reactome         |
| Bladder cancer - Homo sapiens (human)                                                        | 41  | 6 (14.6%)  | 0.002<br>06  | KEGG             |
| Endoderm Differentiation                                                                     | 71  | 8 (11.3%)  | 0.002<br>22  | Wikipath<br>ways |
| Glucocorticoid Receptor Pathway                                                              | 71  | 8 (11.3%)  | 0.002<br>22  | Wikipath<br>ways |
| regulation of map kinase pathways through dual specificity phosphatases                      | 9   | 3 (33.3%)  | 0.002<br>56  | BioCarta         |
| Interleukin-11 Signaling Pathway                                                             | 44  | 6 (13.6%)  | 0.002<br>98  | Wikipath<br>ways |
| Pathways in cancer - Homo sapiens (human)                                                    | 397 | 24 (6.0%)  | 0.003<br>06  | KEGG             |
| Validated targets of C-MYC transcriptional repression                                        | 75  | 8 (10.7%)  | 0.003<br>14  | PID              |
| Mammary gland development pathway - Involution (Stage 4 of 4)                                | 10  | 3 (30.0%)  | 0.003<br>56  | Wikipath<br>ways |

|                                                                                 |     |           |             |                  |
|---------------------------------------------------------------------------------|-----|-----------|-------------|------------------|
| ATF-2 transcription factor network                                              | 61  | 7 (11.5%) | 0.003<br>72 | PID              |
| Aryl Hydrocarbon Receptor Pathway                                               | 46  | 6 (13.0%) | 0.003<br>74 | Wikipath<br>ways |
| Osteoclast differentiation - Homo sapiens (human)                               | 132 | 11 (8.4%) | 0.003<br>93 | KEGG             |
| Regulation of nuclear SMAD2/3 signaling                                         | 79  | 8 (10.3%) | 0.004       | PID              |
| Integrated Pancreatic Cancer Pathway                                            | 170 | 13 (7.6%) | 0.004<br>05 | Wikipath<br>ways |
| NOTCH1 Intracellular Domain Regulates Transcription                             | 48  | 6 (12.5%) | 0.004<br>64 | Reactome         |
| Interleukin-6 signaling                                                         | 11  | 3 (27.3%) | 0.004<br>78 | Reactome         |
| VEGFA-VEGFR2 Signaling Pathway                                                  | 236 | 16 (6.8%) | 0.005       | Wikipath<br>ways |
| HTLV-I infection - Homo sapiens (human)                                         | 258 | 17 (6.6%) | 0.005<br>14 | KEGG             |
| Oncostatin M Signaling Pathway                                                  | 65  | 7 (10.8%) | 0.005<br>31 | Wikipath<br>ways |
| rac1 cell motility signaling pathway                                            | 38  | 5 (13.9%) | 0.006<br>1  | BioCarta         |
| Adenosine P1 receptors                                                          | 4   | 2 (50.0%) | 0.006<br>19 | Reactome         |
| cyclins and cell cycle regulation                                               | 23  | 4 (17.4%) | 0.006<br>21 | BioCarta         |
| Nuclear Receptor transcription pathway                                          | 51  | 6 (11.8%) | 0.006<br>28 | Reactome         |
| Cell Cycle                                                                      | 103 | 9 (8.7%)  | 0.006<br>77 | Wikipath<br>ways |
| IL2 signaling events mediated by PI3K                                           | 37  | 5 (13.5%) | 0.006<br>86 | PID              |
| Signaling pathways regulating pluripotency of stem cells - Homo sapiens (human) | 142 | 11 (7.7%) | 0.007<br>18 | KEGG             |
| Small cell lung cancer - Homo sapiens (human)                                   | 86  | 8 (9.3%)  | 0.007<br>23 | KEGG             |
| Physiological and Pathological Hypertrophy of the Heart                         | 24  | 4 (16.7%) | 0.007<br>26 | Wikipath<br>ways |
| mechanism of gene regulation by peroxisome proliferators via ppara              | 53  | 6 (11.3%) | 0.007<br>57 | BioCarta         |
| Nuclear Receptors                                                               | 38  | 5 (13.2%) | 0.007<br>7  | Wikipath<br>ways |
| Cell cycle - Homo sapiens (human)                                               | 124 | 10 (8.1%) | 0.007<br>72 | KEGG             |
| Proteoglycans in cancer - Homo sapiens (human)                                  | 205 | 14 (6.8%) | 0.007<br>85 | KEGG             |
| Estrogen Receptor Pathway                                                       | 13  | 3 (23.1%) | 0.007<br>89 | Wikipath<br>ways |
| melatonin degradation I                                                         | 13  | 3 (23.1%) | 0.007<br>89 | HumanCy<br>c     |
| NOTCH2 intracellular domain regulates transcription                             | 13  | 3 (23.1%) | 0.007<br>89 | Reactome         |
| G1/S Transition                                                                 | 70  | 7 (10.0%) | 0.007<br>96 | Reactome         |
| IL-7 Signaling Pathway                                                          | 25  | 4 (16.0%) | 0.008<br>42 | Wikipath<br>ways |

|                                                                                      |     |           |             |                  |
|--------------------------------------------------------------------------------------|-----|-----------|-------------|------------------|
| Alpha9 beta1 integrin signaling events                                               | 25  | 4 (16.0%) | 0.008<br>42 | PID              |
| cell cycle: g1/s check point                                                         | 25  | 4 (16.0%) | 0.008<br>42 | BioCarta         |
| segmentation clock                                                                   | 25  | 4 (16.0%) | 0.008<br>42 | BioCarta         |
| AP-1 transcription factor network                                                    | 71  | 7 (9.9%)  | 0.008<br>59 | PID              |
| Signaling by NOTCH                                                                   | 108 | 9 (8.4%)  | 0.008<br>63 | Reactome         |
| Generic Transcription Pathway                                                        | 861 | 41 (4.8%) | 0.009<br>58 | Reactome         |
| superpathway of melatonin degradation                                                | 14  | 3 (21.4%) | 0.009<br>8  | HumanCy<br>c     |
| Notch signaling pathway                                                              | 57  | 6 (10.7%) | 0.009<br>87 | PID              |
| Signaling by NOTCH1                                                                  | 74  | 7 (9.6%)  | 0.009<br>95 | Reactome         |
| Sulindac Metabolic Pathway                                                           | 5   | 2 (40.0%) | 0.010<br>1  | Wikipath<br>ways |
| GRB7 events in ERBB2 signaling                                                       | 5   | 2 (40.0%) | 0.010<br>1  | Reactome         |
| miR-517 relationship with ARCN1 and USP1                                             | 5   | 2 (40.0%) | 0.010<br>1  | Wikipath<br>ways |
| Transcriptional regulation of pluripotent stem cells                                 | 5   | 2 (40.0%) | 0.010<br>1  | Wikipath<br>ways |
| tRNA modification in the mitochondrion                                               | 5   | 2 (40.0%) | 0.010<br>1  | Reactome         |
| DNA Damage Response (only ATM dependent)                                             | 110 | 9 (8.2%)  | 0.010<br>3  | Wikipath<br>ways |
| EGF-Ncore                                                                            | 57  | 6 (10.5%) | 0.010<br>7  | Signalink        |
| Interleukin-6 family signaling                                                       | 27  | 4 (14.8%) | 0.011<br>1  | Reactome         |
| Canonical and Non-canonical Notch signaling                                          | 27  | 4 (14.8%) | 0.011<br>1  | Wikipath<br>ways |
| Signaling by Interleukins                                                            | 373 | 21 (5.6%) | 0.011<br>4  | Reactome         |
| inactivation of gsk3 by akt causes accumulation of b-catenin in alveolar macrophages | 42  | 5 (11.9%) | 0.011<br>7  | BioCarta         |
| IL-2 Signaling Pathway                                                               | 42  | 5 (11.9%) | 0.011<br>7  | Wikipath<br>ways |
| Integrated Cancer Pathway                                                            | 15  | 3 (20.0%) | 0.012       | Wikipath<br>ways |
| ErbB receptor signaling network                                                      | 15  | 3 (20.0%) | 0.012       | PID              |
| Mesodermal Commitment Pathway                                                        | 153 | 11 (7.2%) | 0.012<br>2  | Wikipath<br>ways |
| Reelin signaling pathway                                                             | 28  | 4 (14.3%) | 0.012<br>6  | PID              |
| TGF_beta_Receptor                                                                    | 176 | 12 (6.9%) | 0.012<br>9  | NetPath          |
| IL-6 signaling pathway                                                               | 43  | 5 (11.6%) | 0.012<br>9  | Wikipath<br>ways |
| Signaling by PDGF                                                                    | 331 | 19 (5.8%) | 0.012<br>9  | Reactome         |

|                                                                        |     |           |        |              |
|------------------------------------------------------------------------|-----|-----------|--------|--------------|
| Axon guidance - Homo sapiens (human)                                   | 177 | 12 (6.8%) | 0.0135 | KEGG         |
| Cyclin E associated events during G1/S transition                      | 29  | 4 (13.8%) | 0.0143 | Reactome     |
| Amplification and Expansion of Oncogenic Pathways as Metastatic Traits | 16  | 3 (18.8%) | 0.0144 | Wikipathways |
| let-7 inhibition of ES cell reprogramming                              | 16  | 3 (18.8%) | 0.0144 | Wikipathways |
| Osteoclast Signaling                                                   | 16  | 3 (18.8%) | 0.0144 | Wikipathways |
| IL-6 signaling                                                         | 6   | 2 (33.3%) | 0.0148 | INOH         |
| deregulation of cdk5 in alzheimers disease                             | 6   | 2 (33.3%) | 0.0148 | BioCarta     |
| E2F transcription factor network                                       | 79  | 7 (8.9%)  | 0.015  | PID          |
| Leptin                                                                 | 62  | 6 (9.7%)  | 0.0159 | NetPath      |
| p73 transcription factor network                                       | 81  | 7 (8.8%)  | 0.016  | PID          |
| Dopaminergic Neurogenesis                                              | 30  | 4 (13.3%) | 0.016  | Wikipathways |
| Interleukin-3, 5 and GM-CSF signaling                                  | 226 | 14 (6.2%) | 0.0168 | Reactome     |
| Proton Pump Inhibitor Pathway, Pharmacodynamics                        | 46  | 5 (10.9%) | 0.017  | PharmGKB     |
| Endochondral Ossification                                              | 64  | 6 (9.5%)  | 0.0171 | Wikipathways |
| Signaling by EGFR                                                      | 319 | 18 (5.7%) | 0.0179 | Reactome     |
| MAPK1/MAPK3 signaling                                                  | 206 | 13 (6.3%) | 0.018  | Reactome     |
| Wnt Signaling Pathway and Pluripotency                                 | 101 | 8 (7.9%)  | 0.018  | Wikipathways |
| Presenilin action in Notch and Wnt signaling                           | 47  | 5 (10.6%) | 0.0185 | PID          |
| Heart Development                                                      | 47  | 5 (10.6%) | 0.0185 | Wikipathways |
| Signaling by Leptin                                                    | 208 | 13 (6.3%) | 0.0194 | Reactome     |
| TarBasePathway                                                         | 18  | 3 (16.7%) | 0.0199 | Wikipathways |
| Monoamine Transport                                                    | 32  | 4 (12.5%) | 0.02   | Wikipathways |
| wnt signaling pathway                                                  | 32  | 4 (12.5%) | 0.02   | BioCarta     |
| White fat cell differentiation                                         | 32  | 4 (12.5%) | 0.02   | Wikipathways |
| miR-148a-miR-31-FIH1-HIF1 $\uparrow$ -Notch signaling in glioblastoma  | 7   | 2 (28.6%) | 0.0203 | Wikipathways |
| Interleukin receptor SHC signaling                                     | 210 | 13 (6.2%) | 0.0208 | Reactome     |
| Wnt Signaling Pathway                                                  | 66  | 6 (9.1%)  | 0.021  | Wikipathways |
| Renal cell carcinoma - Homo sapiens (human)                            | 67  | 6 (9.1%)  | 0.021  | KEGG         |
| NHR                                                                    | 49  | 5 (10.2%) | 0.0218 | Signalink    |
| Signaling by NOTCH2                                                    | 33  | 4 (12.1%) | 0.022  | Reactome     |

|                                                                         |     |           |            |                  |
|-------------------------------------------------------------------------|-----|-----------|------------|------------------|
|                                                                         |     |           | 2          |                  |
| EPHA forward signaling                                                  | 33  | 4 (12.1%) | 0.022<br>2 | PID              |
| EGFR Inhibitor Pathway, Pharmacodynamics                                | 67  | 6 (9.0%)  | 0.022<br>5 | PharmGK<br>B     |
| Rac1-Pak1-p38-MMP-2 pathway                                             | 67  | 6 (9.0%)  | 0.022<br>5 | Wikipath<br>ways |
| VEGFR2 mediated cell proliferation                                      | 213 | 13 (6.1%) | 0.023      | Reactome         |
| Phase 4 - resting membrane potential                                    | 19  | 3 (15.8%) | 0.023<br>1 | Reactome         |
| VEGFA-VEGFR2 Pathway                                                    | 282 | 16 (5.7%) | 0.023<br>5 | Reactome         |
| EPHA-mediated growth cone collapse                                      | 34  | 4 (11.8%) | 0.024<br>5 | Reactome         |
| Resolution of D-loop Structures through Holliday Junction Intermediates | 35  | 4 (11.8%) | 0.024<br>5 | Reactome         |
| Downstream signal transduction                                          | 307 | 17 (5.6%) | 0.024<br>6 | Reactome         |
| TP53 Regulates Transcription of Cell Cycle Genes                        | 51  | 5 (9.8%)  | 0.025<br>5 | Reactome         |
| Interleukin-2 signaling                                                 | 217 | 13 (6.0%) | 0.026<br>3 | Reactome         |
| Synthesis of epoxy (EET) and dihydroxyeicosatrienoic acids (DHET)       | 8   | 2 (25.0%) | 0.026<br>5 | Reactome         |
| Interleukin-17 signaling                                                | 8   | 2 (25.0%) | 0.026<br>5 | Reactome         |
| IL-6-type cytokine receptor ligand interactions                         | 20  | 3 (15.0%) | 0.026<br>5 | Reactome         |
| MAPK family signaling cascades                                          | 240 | 14 (5.9%) | 0.026<br>6 | Reactome         |
| Androgen receptor signaling pathway                                     | 89  | 7 (7.9%)  | 0.027      | Wikipath<br>ways |
| RET signaling                                                           | 219 | 13 (6.0%) | 0.028<br>1 | Reactome         |
| Signaling by VEGF                                                       | 290 | 16 (5.5%) | 0.029<br>5 | Reactome         |
| Resolution of D-Loop Structures                                         | 37  | 4 (11.1%) | 0.029<br>6 | Reactome         |
| downregulated of mta-3 in er-negative breast tumors                     | 21  | 3 (14.3%) | 0.030<br>2 | BioCarta         |
| Methionine De Novo and Salvage Pathway                                  | 21  | 3 (14.3%) | 0.030<br>2 | Wikipath<br>ways |
| Cytokine Signaling in Immune system                                     | 487 | 24 (4.9%) | 0.030<br>9 | Reactome         |
| RAF/MAP kinase cascade                                                  | 200 | 12 (6.0%) | 0.031<br>6 | Reactome         |
| SHC1 events in EGFR signaling                                           | 200 | 12 (6.0%) | 0.031<br>6 | Reactome         |
| SOS-mediated signalling                                                 | 200 | 12 (6.0%) | 0.031<br>6 | Reactome         |
| GRB2 events in EGFR signaling                                           | 200 | 12 (6.0%) | 0.031<br>6 | Reactome         |
| IL2-mediated signaling events                                           | 54  | 5 (9.3%)  | 0.031<br>7 | PID              |
| Circadian Clock                                                         | 38  | 4 (10.8%) | 0.032      | Reactome         |

|                                                              |     |           |            |                  |
|--------------------------------------------------------------|-----|-----------|------------|------------------|
|                                                              |     |           | 3          |                  |
| Activation of ATR in response to replication stress          | 37  | 4 (10.8%) | 0.032<br>3 | Reactome         |
| Chronic myeloid leukemia - Homo sapiens (human)              | 73  | 6 (8.2%)  | 0.032<br>6 | KEGG             |
| Adrenoceptors                                                | 9   | 2 (22.2%) | 0.033<br>3 | Reactome         |
| Synthesis of (16-20)-hydroxyeicosatetraenoic acids (HETE)    | 9   | 2 (22.2%) | 0.033<br>3 | Reactome         |
| MAPK1 (ERK2) activation                                      | 9   | 2 (22.2%) | 0.033<br>3 | Reactome         |
| Metabolism of ingested SeMet, Sec, MeSec into H2Se           | 9   | 2 (22.2%) | 0.033<br>3 | Reactome         |
| TGF-beta Receptor Signaling                                  | 55  | 5 (9.1%)  | 0.034      | Wikipath<br>ways |
| ErbB Signaling Pathway                                       | 55  | 5 (9.1%)  | 0.034      | Wikipath<br>ways |
| Signalling to p38 via RIT and RIN                            | 204 | 12 (5.9%) | 0.036      | Reactome         |
| ARMS-mediated activation                                     | 204 | 12 (5.9%) | 0.036      | Reactome         |
| Viral carcinogenesis - Homo sapiens (human)                  | 203 | 12 (5.9%) | 0.036      | KEGG             |
| Regulation of lipolysis in adipocytes - Homo sapiens (human) | 56  | 5 (8.9%)  | 0.036<br>4 | KEGG             |
| Non-small cell lung cancer - Homo sapiens (human)            | 56  | 5 (8.9%)  | 0.036<br>4 | KEGG             |
| Sudden Infant Death Syndrome (SIDS) Susceptibility Pathways  | 159 | 10 (6.3%) | 0.037<br>1 | Wikipath<br>ways |
| Frs2-mediated activation                                     | 205 | 12 (5.9%) | 0.037<br>2 | Reactome         |
| Cyclin D associated events in G1                             | 39  | 4 (10.3%) | 0.038<br>3 | Reactome         |
| G1 Phase                                                     | 39  | 4 (10.3%) | 0.038<br>3 | Reactome         |
| Signaling events regulated by Ret tyrosine kinase            | 39  | 4 (10.3%) | 0.038<br>3 | PID              |
| O-glycosylation of TSR domain-containing proteins            | 39  | 4 (10.3%) | 0.038<br>3 | Reactome         |
| IL11                                                         | 23  | 3 (13.0%) | 0.038<br>4 | NetPath          |
| Sympathetic Nerve Pathway (Neuroeffector Junction)           | 23  | 3 (13.0%) | 0.038<br>4 | PharmGK<br>B     |
| ctcf: first multivalent nuclear factor                       | 23  | 3 (13.0%) | 0.038<br>4 | BioCarta         |
| Prolactin Signaling Pathway                                  | 76  | 6 (7.9%)  | 0.038<br>6 | Wikipath<br>ways |
| Acute myeloid leukemia - Homo sapiens (human)                | 57  | 5 (8.8%)  | 0.038<br>8 | KEGG             |
| Prolonged ERK activation events                              | 207 | 12 (5.8%) | 0.039<br>6 | Reactome         |
| NCAM signaling for neurite out-growth                        | 231 | 13 (5.7%) | 0.040<br>7 | Reactome         |
| Organic cation transport                                     | 11  | 2 (20.0%) | 0.040<br>7 | Reactome         |
| MAPK3 (ERK1) activation                                      | 10  | 2 (20.0%) | 0.040<br>7 | Reactome         |

|                                                                                   |     |           |        |              |
|-----------------------------------------------------------------------------------|-----|-----------|--------|--------------|
| LIF signaling                                                                     | 10  | 2 (20.0%) | 0.0407 | INOH         |
| methionine salvage cycle III                                                      | 10  | 2 (20.0%) | 0.0407 | HumanCyc     |
| overview of telomerase protein component gene htert transcriptional regulation    | 10  | 2 (20.0%) | 0.0407 | BioCarta     |
| Signaling by FGFR3 fusions in cancer                                              | 10  | 2 (20.0%) | 0.0407 | Reactome     |
| EV release from cardiac cells and their functional effects                        | 10  | 2 (20.0%) | 0.0407 | Wikipathways |
| RORA activates gene expression                                                    | 10  | 2 (20.0%) | 0.0407 | Reactome     |
| Negative regulation of activity of TFAP2 (AP-2) family transcription factors      | 10  | 2 (20.0%) | 0.0407 | Reactome     |
| IL6                                                                               | 77  | 6 (7.8%)  | 0.0408 | NetPath      |
| Negative regulation of MAPK pathway                                               | 40  | 4 (10.0%) | 0.0415 | Reactome     |
| IL-5 Signaling Pathway                                                            | 40  | 4 (10.0%) | 0.0415 | Wikipathways |
| tRNA modification in the nucleus and cytosol                                      | 40  | 4 (10.0%) | 0.0415 | Reactome     |
| Signalling to RAS                                                                 | 209 | 12 (5.8%) | 0.0421 | Reactome     |
| Glycosaminoglycan biosynthesis - heparan sulfate / heparin - Homo sapiens (human) | 24  | 3 (12.5%) | 0.0428 | KEGG         |
| Kit receptor signaling pathway                                                    | 59  | 5 (8.5%)  | 0.044  | Wikipathways |
| SHP2 signaling                                                                    | 59  | 5 (8.5%)  | 0.044  | PID          |
| Preimplantation Embryo                                                            | 59  | 5 (8.5%)  | 0.044  | Wikipathways |
| G2/M Checkpoints                                                                  | 121 | 8 (6.7%)  | 0.0442 | Reactome     |
| Cell Differentiation - meta                                                       | 60  | 5 (8.3%)  | 0.0468 | Wikipathways |
| Rap1 signaling pathway - Homo sapiens (human)                                     | 212 | 12 (5.7%) | 0.0475 | KEGG         |
| Nucleotide GPCRs                                                                  | 11  | 2 (18.2%) | 0.0487 | Wikipathways |
| Signaling mediated by p38-gamma and p38-delta                                     | 12  | 2 (18.2%) | 0.0487 | PID          |
| il22 soluble receptor signaling pathway                                           | 11  | 2 (18.2%) | 0.0487 | BioCarta     |
| cxcr4 signaling pathway                                                           | 11  | 2 (18.2%) | 0.0487 | BioCarta     |
| Signaling by FGFR4 in disease                                                     | 11  | 2 (18.2%) | 0.0487 | Reactome     |
| cardiac protection against ros                                                    | 12  | 2 (18.2%) | 0.0487 | BioCarta     |
| POU5F1 (OCT4), SOX2, NANOG repress genes related to differentiation               | 11  | 2 (18.2%) | 0.0487 | Reactome     |
| Axon guidance                                                                     | 487 | 23 (4.8%) | 0.0491 | Reactome     |
| Developmental Biology                                                             | 748 | 33 (4.4%) | 0.0494 | Reactome     |



|                                            |    |          |        |         |
|--------------------------------------------|----|----------|--------|---------|
| Coregulation of Androgen receptor activity | 61 | 5 (8.2%) | 0.0497 | PID     |
| Notch                                      | 62 | 5 (8.2%) | 0.0497 | NetPath |
