# Supplementary material for: Estrogen receptor alpha (ERα)–mediated coregulator binding and gene expression discriminates the toxic ERα agonist diethylstilbestrol (DES) from the endogenous ERα agonist 17β-estradiol (E2)
Source: PubMed Central journal article supplement (PMC7505815; doi:10.1007/s10565-020-09516-6), 2020-02-22
Supplement: 10565_2020_9516_MOESM4_ESM.pdf [file 10565_2020_9516_MOESM4_ESM.pdf]

### Pathway analyses of the genes that expressed by DES only

| Pathway name                                                                                                        | set size | candidates contained | p-value  | pathway source |
|---------------------------------------------------------------------------------------------------------------------|----------|----------------------|----------|----------------|
| Electron Transport Chain                                                                                            | 103      | 12 (11.7%)           | 1.43E-05 | Wikipathways   |
| Oxidative phosphorylation - Homo sapiens (human)                                                                    | 133      | 13 (9.8%)            | 4.23E-05 | KEGG           |
| Parkinson,s disease - Homo sapiens (human)                                                                          | 142      | 13 (9.2%)            | 8.36E-05 | KEGG           |
| Transmembrane transport of small molecules                                                                          | 628      | 32 (5.1%)            | 0.0002   | Reactome       |
| Respiratory electron transport, ATP synthesis by chemiosmotic coupling, and heat production by uncoupling proteins. | 126      | 11 (8.8%)            | 0.000411 | Reactome       |
| The citric acid (TCA) cycle and respiratory electron transport                                                      | 171      | 13 (7.6%)            | 0.000498 | Reactome       |
| Oxidative phosphorylation                                                                                           | 61       | 7 (11.5%)            | 0.000985 | Wikipathways   |
| Respiratory electron transport                                                                                      | 103      | 9 (8.8%)             | 0.00134  | Reactome       |
| Exercise-induced Circadian Regulation                                                                               | 48       | 6 (12.5%)            | 0.00144  | Wikipathways   |
| Stimuli-sensing channels                                                                                            | 104      | 9 (8.7%)             | 0.00153  | Reactome       |
| Multifunctional anion exchangers                                                                                    | 10       | 3 (30.0%)            | 0.00182  | Reactome       |
| Mineral absorption - Homo sapiens (human)                                                                           | 52       | 6 (11.5%)            | 0.00219  | KEGG           |
| Allograft rejection - Homo sapiens (human)                                                                          | 38       | 5 (13.5%)            | 0.00254  | KEGG           |
| Graft-versus-host disease - Homo sapiens (human)                                                                    | 41       | 5 (12.2%)            | 0.00401  | KEGG           |
| Endosomal/Vacuolar pathway                                                                                          | 13       | 3 (23.1%)            | 0.0041   | Reactome       |
| Glycerolipid metabolism - Homo sapiens (human)                                                                      | 59       | 6 (10.2%)            | 0.00417  | KEGG           |
| Neural Crest Differentiation                                                                                        | 101      | 8 (7.9%)             | 0.00476  | Wikipathways   |
| Type I diabetes mellitus - Homo sapiens (human)                                                                     | 43       | 5 (11.6%)            | 0.00493  | KEGG           |
| GPR40 PATHWAY                                                                                                       | 14       | 3 (21.4%)            | 0.00512  | Wikipathways   |
| Insulin secretion - Homo sapiens (human)                                                                            | 85       | 7 (8.2%)             | 0.00657  | KEGG           |
| Transport of inorganic cations/anions and amino acids/oligopeptides                                                 | 107      | 8 (7.5%)             | 0.00673  | Reactome       |
| Alcoholism - Homo sapiens (human)                                                                                   | 180      | 11 (6.1%)            | 0.00743  | KEGG           |
| Ion channel transport                                                                                               | 209      | 12 (5.7%)            | 0.00856  | Reactome       |
| mechanism of acetaminophen activity and toxicity                                                                    | 6        | 2 (33.3%)            | 0.00943  | BioCarta       |
| Autoimmune thyroid disease - Homo sapiens (human)                                                                   | 53       | 5 (9.6%)             | 0.011    | KEGG           |
| HDACs deacetylate histones                                                                                          | 94       | 7 (7.4%)             | 0.0112   | Reactome       |
| Formation of the beta-catenin:TCF transactivating complex                                                           | 95       | 7 (7.4%)             | 0.0112   | Reactome       |
| NrCAM interactions                                                                                                  | 7        | 2 (28.6%)            | 0.013    | Reactome       |
| Proton-coupled monocarboxylate transport                                                                            | 7        | 2 (28.6%)            | 0.013    | Reactome       |
| Binding of TCF/LEF:CTNNB1 to target gene promoters                                                                  | 7        | 2 (28.6%)            | 0.013    | Reactome       |
| Alzheimer,s disease - Homo sapiens (human)                                                                          | 171      | 10 (5.8%)            | 0.0139   | KEGG           |
| Glutathione metabolism                                                                                              | 20       | 3 (15.0%)            | 0.0143   | Wikipathways   |
| Wnt-beta-catenin Signaling Pathway in Leukemia                                                                      | 20       | 3 (15.0%)            | 0.0143   | Wikipathways   |
| RNA degradation - Homo sapiens (human)                                                                              | 77       | 6 (7.8%)             | 0.0149   | KEGG           |

|                                                                                                 |     |           |        |              |
|-------------------------------------------------------------------------------------------------|-----|-----------|--------|--------------|
| ERCC6 (CSB) and EHMT2 (G9a) positively regulate rRNA expression                                 | 79  | 6 (7.7%)  | 0.0158 | Reactome     |
| Complex I biogenesis                                                                            | 57  | 5 (8.8%)  | 0.016  | Reactome     |
| CDC6 association with the ORC:origin complex                                                    | 8   | 2 (25.0%) | 0.017  | Reactome     |
| Recognition and association of DNA glycosylase with site containing an affected pyrimidine      | 8   | 2 (25.0%) | 0.017  | Reactome     |
| Cleavage of the damaged pyrimidine                                                              | 8   | 2 (25.0%) | 0.017  | Reactome     |
| Depyrimidination                                                                                | 8   | 2 (25.0%) | 0.017  | Reactome     |
| Histidine catabolism                                                                            | 8   | 2 (25.0%) | 0.017  | Reactome     |
| Allograft Rejection                                                                             | 80  | 6 (7.5%)  | 0.0177 | Wikipathways |
| Phagosome - Homo sapiens (human)                                                                | 154 | 9 (5.9%)  | 0.0185 | KEGG         |
| Homologous recombination - Homo sapiens (human)                                                 | 41  | 4 (9.8%)  | 0.0213 | KEGG         |
| sphingosine and sphingosine-1-phosphate metabolism                                              | 9   | 2 (22.2%) | 0.0215 | HumanCyc     |
| Antigen Presentation: Folding, assembly and peptide loading of class I MHC                      | 24  | 3 (12.5%) | 0.0235 | Reactome     |
| Histidine metabolism - Homo sapiens (human)                                                     | 24  | 3 (12.5%) | 0.0235 | KEGG         |
| Meiotic recombination                                                                           | 65  | 5 (7.8%)  | 0.0252 | Reactome     |
| TRP channels                                                                                    | 25  | 3 (12.0%) | 0.0262 | Reactome     |
| Glycogen synthesis                                                                              | 10  | 2 (20.0%) | 0.0264 | Reactome     |
| Base-Excision Repair, AP Site Formation                                                         | 10  | 2 (20.0%) | 0.0264 | Reactome     |
| RNA Polymerase I Promoter Opening                                                               | 66  | 5 (7.7%)  | 0.0267 | Reactome     |
| Tacrolimus/Cyclosporine Pathway, Pharmacodynamics                                               | 44  | 4 (9.1%)  | 0.0269 | PharmGKB     |
| Integrins in angiogenesis                                                                       | 66  | 5 (7.6%)  | 0.0283 | PID          |
| DNA methylation                                                                                 | 68  | 5 (7.5%)  | 0.03   | Reactome     |
| Signaling by Rho GTPases                                                                        | 434 | 18 (4.2%) | 0.0315 | Reactome     |
| Gamma-glutamyl-transpeptidase deficiency                                                        | 11  | 2 (18.2%) | 0.0317 | SMPDB        |
| 5-oxoprolinase deficiency                                                                       | 11  | 2 (18.2%) | 0.0317 | SMPDB        |
| Gamma-Glutamyltransferase Deficiency                                                            | 11  | 2 (18.2%) | 0.0317 | SMPDB        |
| Glutathione Metabolism                                                                          | 11  | 2 (18.2%) | 0.0317 | SMPDB        |
| Glutathione Synthetase Deficiency                                                               | 11  | 2 (18.2%) | 0.0317 | SMPDB        |
| 5-Oxoprolinuria                                                                                 | 11  | 2 (18.2%) | 0.0317 | SMPDB        |
| Spinal Cord Injury                                                                              | 117 | 7 (6.0%)  | 0.0329 | Wikipathways |
| Activated PKN1 stimulates transcription of AR (androgen receptor) regulated genes KLK2 and KLK3 | 70  | 5 (7.2%)  | 0.0335 | Reactome     |
| Synthesis of IP3 and IP4 in the cytosol                                                         | 28  | 3 (10.7%) | 0.0353 | Reactome     |
| Resolution of D-loop Structures through Synthesis-Dependent Strand Annealing (SDSA)             | 28  | 3 (10.7%) | 0.0353 | Reactome     |
| SLC-mediated transmembrane transport                                                            | 286 | 13 (4.6%) | 0.0356 | Reactome     |
| il-2 receptor beta chain in t cell activation                                                   | 48  | 4 (8.3%)  | 0.0356 | BioCarta     |
| Longevity regulating pathway - Homo sapiens (human)                                             | 94  | 6 (6.4%)  | 0.0357 | KEGG         |
| Bile secretion - Homo sapiens (human)                                                           | 71  | 5 (7.0%)  | 0.0372 | KEGG         |
| SIRT1 negatively regulates rRNA Expression                                                      | 72  | 5 (7.0%)  | 0.0372 | Reactome     |
| Glycerophospholipid metabolism - Homo sapiens (human)                                           | 95  | 6 (6.3%)  | 0.0373 | KEGG         |
| antigen processing and presentation                                                             | 12  | 2 (16.7%) | 0.0374 | BioCarta     |
| Generic Transcription Pathway                                                                   | 861 | 31 (3.6%) | 0.038  | Reactome     |

|                                                                                   |     |           |        |              |
|-----------------------------------------------------------------------------------|-----|-----------|--------|--------------|
| Cocaine addiction - Homo sapiens (human)                                          | 49  | 4 (8.2%)  | 0.038  | KEGG         |
| Antigen processing-Cross presentation                                             | 49  | 4 (8.2%)  | 0.038  | Reactome     |
| Dectin-2 family                                                                   | 29  | 3 (10.3%) | 0.0386 | Reactome     |
| triacylglycerol biosynthesis                                                      | 29  | 3 (10.3%) | 0.0386 | HumanCyc     |
| Axon guidance - Homo sapiens (human)                                              | 177 | 9 (5.1%)  | 0.0405 | KEGG         |
| TP53 Regulates Transcription of Cell Cycle Genes                                  | 13  | 2 (15.4%) | 0.0435 | Wikipathways |
| Familial lipoprotein lipase deficiency                                            | 13  | 2 (15.4%) | 0.0435 | SMPDB        |
| Glycerolipid Metabolism                                                           | 13  | 2 (15.4%) | 0.0435 | SMPDB        |
| Glycerol Kinase Deficiency                                                        | 13  | 2 (15.4%) | 0.0435 | SMPDB        |
| D-glyceric aciduria                                                               | 13  | 2 (15.4%) | 0.0435 | SMPDB        |
| multiple antiapoptotic pathways from igf-1r signaling lead to bad phosphorylation | 13  | 2 (15.4%) | 0.0435 | BioCarta     |
| Methotrexate Pathway, Pharmacokinetics                                            | 13  | 2 (15.4%) | 0.0435 | PharmGKB     |
| Transcriptional misregulation in cancer - Homo sapiens (human)                    | 180 | 9 (5.0%)  | 0.0443 | KEGG         |
| Fatty acid, triacylglycerol, and ketone body metabolism                           | 153 | 8 (5.3%)  | 0.045  | Reactome     |
| role of mef2d in t-cell apoptosis                                                 | 31  | 3 (9.7%)  | 0.0458 | BioCarta     |
| Potassium Channels                                                                | 100 | 6 (6.0%)  | 0.046  | Reactome     |
| PRC2 methylates histones and DNA                                                  | 77  | 5 (6.6%)  | 0.0476 | Reactome     |
| Condensation of Prophase Chromosomes                                              | 77  | 5 (6.6%)  | 0.0476 | Reactome     |
| CD4 T cell receptor signaling-JNK cascade                                         | 53  | 4 (7.5%)  | 0.0485 | INOH         |
| Oxidative Stress Induced Senescence                                               | 129 | 7 (5.5%)  | 0.0495 | Reactome     |
| Antigen processing and presentation - Homo sapiens (human)                        | 77  | 5 (6.5%)  | 0.0499 | KEGG         |
| Irinotecan Pathway                                                                | 14  | 2 (14.3%) | 0.0499 | Wikipathways |
| CDT1 association with the CDC6:ORC:origin complex                                 | 14  | 2 (14.3%) | 0.0499 | Reactome     |
| Repression of WNT target genes                                                    | 14  | 2 (14.3%) | 0.0499 | Reactome     |
