# Supplementary material for: Estrogen receptor alpha (ERα)–mediated coregulator binding and gene expression discriminates the toxic ERα agonist diethylstilbestrol (DES) from the endogenous ERα agonist 17β-estradiol (E2)
Source: PubMed Central journal article supplement (PMC7505815; doi:10.1007/s10565-020-09516-6), 2020-02-22
Supplement: 10565_2020_9516_MOESM5_ESM.pdf [file 10565_2020_9516_MOESM5_ESM.pdf]

**Pathway analyses of the genes that expressed by E2 only**

| Pathway name                                                                                                                         | Set size | Candidate contained | p-value | Pathway source |
|--------------------------------------------------------------------------------------------------------------------------------------|----------|---------------------|---------|----------------|
| HDMs demethylate histones                                                                                                            | 52       | 5 (9.6%)            | 0.00176 | Reactome       |
| BMP Signalling Pathway                                                                                                               | 19       | 3 (15.8%)           | 0.00373 | HumanCyc       |
| Lipid storage and perilipins in skeletal muscle                                                                                      | 6        | 2 (33.3%)           | 0.00405 | Wikipathways   |
| Hormone-sensitive lipase (HSL)-mediated triacylglycerol hydrolysis                                                                   | 20       | 3 (15.0%)           | 0.00434 | Reactome       |
| Signaling by BMP                                                                                                                     | 22       | 3 (13.6%)           | 0.00572 | Reactome       |
| Collagen biosynthesis and modifying enzymes                                                                                          | 70       | 5 (7.1%)            | 0.00643 | Reactome       |
| Glycosphingolipid metabolism                                                                                                         | 46       | 4 (8.7%)            | 0.00733 | Reactome       |
| Vitamin C (ascorbate) metabolism                                                                                                     | 8        | 2 (25.0%)           | 0.00739 | Reactome       |
| Collagen chain trimerization                                                                                                         | 47       | 4 (8.5%)            | 0.00791 | Reactome       |
| Synaptic Vesicle Pathway                                                                                                             | 51       | 4 (7.8%)            | 0.0105  | Wikipathways   |
| Resolution of D-loop Structures through Synthesis-Dependent Strand Annealing (SDSA)                                                  | 28       | 3 (10.7%)           | 0.0113  | Reactome       |
| Interaction between L1 and Ankyrins                                                                                                  | 30       | 3 (10.0%)           | 0.0137  | Reactome       |
| Ligand-independent caspase activation via DCC                                                                                        | 11       | 2 (18.2%)           | 0.014   | Reactome       |
| BMP2 signaling TGF-beta MV                                                                                                           | 56       | 4 (7.1%)            | 0.0145  | INOH           |
| Ovarian Infertility Genes                                                                                                            | 31       | 3 (9.7%)            | 0.0149  | Wikipathways   |
| Mucin type O-glycan biosynthesis - Homo sapiens (human)                                                                              | 31       | 3 (9.7%)            | 0.0149  | KEGG           |
| Viral myocarditis - Homo sapiens (human)                                                                                             | 59       | 4 (6.9%)            | 0.0163  | KEGG           |
| P2Y receptors                                                                                                                        | 12       | 2 (16.7%)           | 0.0167  | Reactome       |
| Bone Morphogenic Protein (BMP) Signalling and Regulation                                                                             | 12       | 2 (16.7%)           | 0.0167  | Wikipathways   |
| Protein digestion and absorption - Homo sapiens (human)                                                                              | 90       | 5 (5.6%)            | 0.0179  | KEGG           |
| BMP signaling Dro                                                                                                                    | 34       | 3 (8.8%)            | 0.0192  | INOH           |
| Resolution of D-loop Structures through Holliday Junction Intermediates                                                              | 35       | 3 (8.8%)            | 0.0192  | Reactome       |
| Depolarization of the Presynaptic Terminal Triggers the Opening of Calcium Channels                                                  | 13       | 2 (15.4%)           | 0.0195  | Reactome       |
| The activation of arylsulfatases                                                                                                     | 13       | 2 (15.4%)           | 0.0195  | Reactome       |
| Collagen formation                                                                                                                   | 94       | 5 (5.3%)            | 0.0211  | Reactome       |
| Synaptic vesicle cycle - Homo sapiens (human)                                                                                        | 63       | 4 (6.3%)            | 0.0215  | KEGG           |
| Resolution of D-Loop Structures                                                                                                      | 37       | 3 (8.3%)            | 0.0223  | Reactome       |
| IL5-mediated signaling events                                                                                                        | 14       | 2 (14.3%)           | 0.0225  | PID            |
| TP53 regulates transcription of several additional cell death genes whose specific roles in p53-dependent apoptosis remain uncertain | 14       | 2 (14.3%)           | 0.0225  | Reactome       |
| triacylglycerol degradation                                                                                                          | 14       | 2 (14.3%)           | 0.0225  | HumanCyc       |
| Synthesis of PE                                                                                                                      | 14       | 2 (14.3%)           | 0.0225  | Reactome       |

|                                                              |     |           |        |              |
|--------------------------------------------------------------|-----|-----------|--------|--------------|
| Adipogenesis                                                 | 131 | 6 (4.6%)  | 0.0233 | Wikipathways |
| HIF-1-alpha transcription factor network                     | 67  | 4 (6.0%)  | 0.0262 | PID          |
| Metabolism of nucleotides                                    | 100 | 5 (5.0%)  | 0.0268 | Reactome     |
| Nucleotide-like (purinergic) receptors                       | 16  | 2 (12.5%) | 0.029  | Reactome     |
| Deregulation of Rab and Rab Effector Genes in Bladder Cancer | 16  | 2 (12.5%) | 0.029  | Wikipathways |
| BMP receptor signaling                                       | 41  | 3 (7.3%)  | 0.0314 | PID          |
| Bile Acid Biosynthesis                                       | 17  | 2 (11.8%) | 0.0325 | SMPDB        |
| 27-Hydroxylase Deficiency                                    | 17  | 2 (11.8%) | 0.0325 | SMPDB        |
| Congenital Bile Acid Synthesis Defect Type II                | 17  | 2 (11.8%) | 0.0325 | SMPDB        |
| Cerebrotendinous Xanthomatosis (CTX)                         | 17  | 2 (11.8%) | 0.0325 | SMPDB        |
| Zellweger Syndrome                                           | 17  | 2 (11.8%) | 0.0325 | SMPDB        |
| Familial Hypercholanemia (FHCA)                              | 17  | 2 (11.8%) | 0.0325 | SMPDB        |
| Congenital Bile Acid Synthesis Defect Type III               | 17  | 2 (11.8%) | 0.0325 | SMPDB        |
| Primary bile acid biosynthesis - Homo sapiens (human)        | 17  | 2 (11.8%) | 0.0325 | KEGG         |
| TGF-Core                                                     | 42  | 3 (7.1%)  | 0.0334 | Signalink    |
| Protein-protein interactions at synapses                     | 73  | 4 (5.5%)  | 0.0345 | Reactome     |
| Transmembrane transport of small molecules                   | 628 | 17 (2.7%) | 0.0354 | Reactome     |
| Homologous DNA Pairing and Strand Exchange                   | 43  | 3 (7.0%)  | 0.0354 | Reactome     |
| JAK-STAT                                                     | 43  | 3 (7.0%)  | 0.0354 | Wikipathways |
| Estrogen metabolism                                          | 18  | 2 (11.1%) | 0.0361 | Wikipathways |
| ABC transporters in lipid homeostasis                        | 18  | 2 (11.1%) | 0.0361 | Reactome     |
| Other glycan degradation - Homo sapiens (human)              | 18  | 2 (11.1%) | 0.0361 | KEGG         |
| Lipid digestion, mobilization, and transport                 | 110 | 5 (4.5%)  | 0.0381 | Reactome     |
| PRC2 methylates histones and DNA                             | 77  | 4 (5.3%)  | 0.0391 | Reactome     |
| Glucose transport                                            | 45  | 3 (6.7%)  | 0.0398 | Reactome     |
| Growth hormone receptor signaling                            | 19  | 2 (10.5%) | 0.04   | Reactome     |
| HH-Core                                                      | 19  | 2 (10.5%) | 0.04   | Signalink    |
| Calcium Regulation in the Cardiac Cell                       | 149 | 6 (4.0%)  | 0.0402 | Wikipathways |
| RNA degradation - Homo sapiens (human)                       | 77  | 4 (5.2%)  | 0.0408 | KEGG         |
| Globo Sphingolipid Metabolism                                | 20  | 2 (10.0%) | 0.0439 | Wikipathways |
| sprouty regulation of tyrosine kinase signals                | 20  | 2 (10.0%) | 0.0439 | BioCarta     |
| Hippo signaling pathway - Homo sapiens (human)               | 154 | 6 (3.9%)  | 0.0447 | KEGG         |
| Allograft Rejection                                          | 80  | 4 (5.0%)  | 0.0458 | Wikipathways |
| Asymmetric localization of PCP proteins                      | 21  | 2 (9.5%)  | 0.048  | Reactome     |
| Toxoplasmosis - Homo sapiens (human)                         | 118 | 5 (4.2%)  | 0.0491 | KEGG         |
